# Supplementary material for: Hybridization of helical poly(phenylacetylene)s bearing l-proline tripeptide pendants into porous silica microspheres as a solvent-tolerable chiral stationary phase for liquid chromatography
Source: Royal Society of Chemistry journal article supplement (doi:10.1039/d3an00061c), 2023-01-01
Supplement: d3an00061c1.pdf [file d3an00061c1.pdf]

## Electronic Supplementary Information

# Hybridization of helical poly(phenylacetylene)s bearing L-proline tripeptide pendants into silica porous microspheres as a solvent tolerability CSP for liquid chromatography

Jiahe Huang <sup>a</sup>, Zhengjin Zhou <sup>a</sup>, Chunhong Zhang <sup>a, b\*</sup>, Chao Wang <sup>a, b</sup>, Yanli Zhou <sup>a</sup>, Lijia Liu <sup>a, b\*</sup>, Junqing Li <sup>a\*</sup>, Toshifumi Satoh <sup>c</sup>, Yoshio Okamoto <sup>a, d</sup>

<sup>a</sup> Key Laboratory of Superlight Materials and Surface Technology, Ministry of Education, College of Materials Science and Chemical Engineering, Harbin Engineering University, Harbin, 150001, PR China.

<sup>b</sup> Yantai Research Institute of Harbin Engineering University, Yantai, 264006, P.R. China.

<sup>c</sup> Faculty of Engineering, Hokkaido University, Sapporo 060-8628, Japan.

<sup>d</sup> Graduate School of Engineering, Nagoya University, Furo-cho, Chikusa-ku, Nagoya 464-8603, Japan.

## 1. Characterization of intermediate products

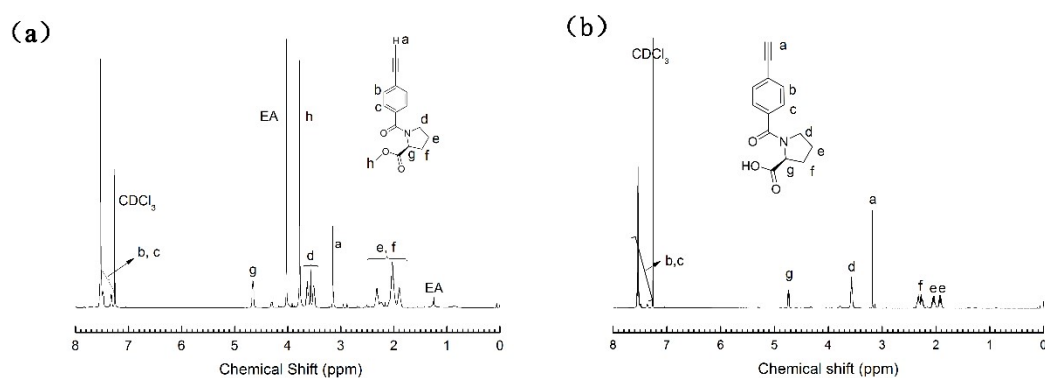

**Fig. S1†** <sup>1</sup>H-NMR spectra of (a) intermediate product **a** and (b) intermediate product

**b.**

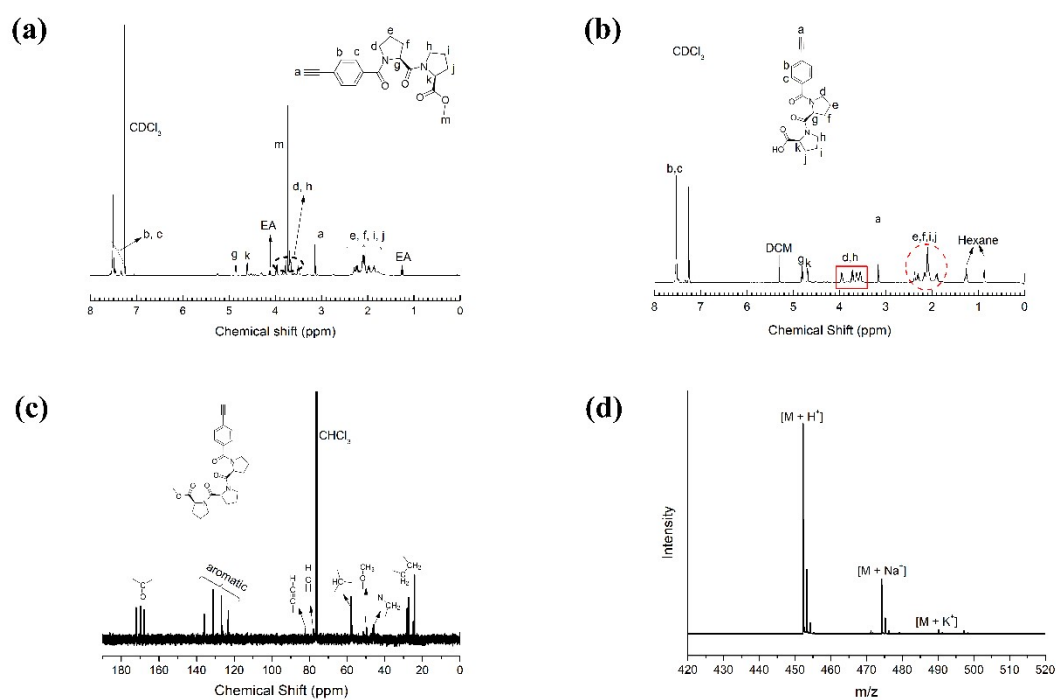

**Fig. S2†**  $^1\text{H-NMR}$  spectra of (a) intermediate product **c** and (b) intermediate products **d**; (c)  $^{13}\text{C-NMR}$  spectrum of PA-P<sub>3</sub>-ee; (d) ESI-MS spectrum of PA-P<sub>3</sub>-ee 4-Ethynylbenzoic acid (Fig. S3† (a)):  $^1\text{H-NMR}$  (500 MHz,  $\text{CDCl}_3$ , TMS, 20 °C, ppm):  $\delta = 8.06$  (Ar-**H**, 2H), 7.55 (Ar-**H**, 2H), 3.26 ( $\equiv\text{CH}$ , 1H).

PA-APTES (Fig. S3† (b)):  $^1\text{H-NMR}$  (500 MHz,  $\text{CDCl}_3$ , TMS, 20 °C, ppm):  $\delta = 7.99$ -7.97 (Ar-**H**, 2H), 7.53-7.51 (Ar-**H**, 2H), 4.40-4.36 (-O-**CH**<sub>2</sub>-CH<sub>3</sub>, 2H), 1.41-1.37 (-CH<sub>2</sub>-**CH**<sub>3</sub>, 3H), 0.25 (-Si-(**CH**<sub>3</sub>)<sub>3</sub>, 9H).

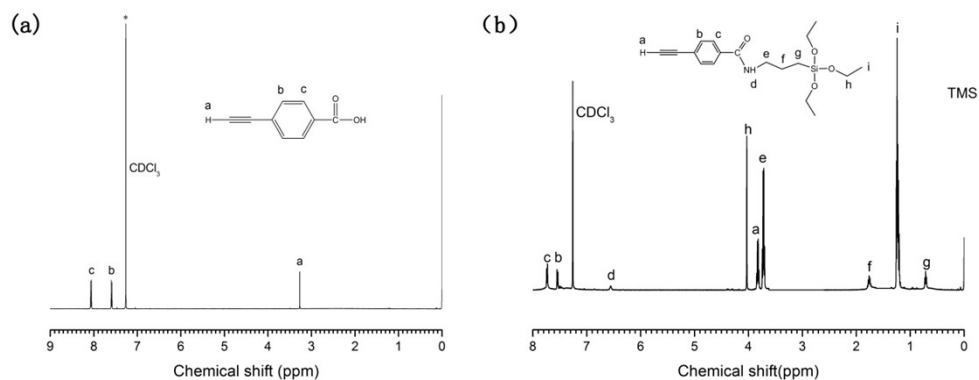

**Fig. S3†**  $^1\text{H-NMR}$  spectra of (a) 4-ethynylbenzoic acid and (b) PA-APTES

## 2 Preparation of homopolymer PPA

The typical procedure for preparing CPA is depicted as follows. PA-P<sub>3</sub>-ee (0.20

g, 0.44 mmol), PA-APTES (3.2 mg, 0.0092 mmol), Rh(nbd)BPh<sub>4</sub> (4.56 mg, 0.0087 mmol) and CHCl<sub>3</sub> (15 mL) were added into a flask (50 mL) under a N<sub>2</sub> atmosphere, stirring at 28 °C for 24 h, PPh<sub>3</sub> (5.2 mg, 0.020 mmol) was added into the solutions. The mixture was concentrated, and then dropped it into a lot of n-hexane, a yellow solid CPA was obtained by filtrated. <sup>1</sup>H-NMR (500 MHz, DMSO-*d*<sub>6</sub>, TMS, 80 °C, ppm) (Fig. S4†) δ = 7.69-6.71 (aromatic, 4H), 5.92 (main chain, 1H), 4.96-4.11 (-N-CHCOO-, 3H), 3.72-3.43 (-O-CH<sub>3</sub>, 3H), 3.39-3.06 (-N-CH<sub>2</sub>-, 6H), 2.33-1.36 (-CH<sub>2</sub>-CH<sub>2</sub>-, 12H).

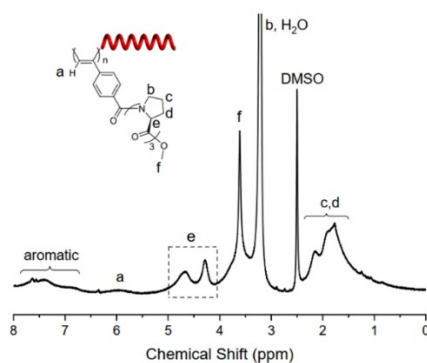

Fig. S4† <sup>1</sup>H-NMR spectrum of PPA

### 3 Preparation of SiO<sub>2</sub> porous microspheres (SiO<sub>2</sub> PMS)

A typical procedure for preparing SiO<sub>2</sub> PMS is described as follows. The aqueous solution of tetraethyl orthosilicate (TEOS) was added in a mixture solution (120 mL) of H<sub>2</sub>O, ethanol and NH<sub>3</sub>·H<sub>2</sub>O. The solution was stirred at 25 °C for 6 h to obtain SiO<sub>2</sub> seeds solution. CTAB (6.5 g, 17.84 mmol), H<sub>2</sub>O, NH<sub>3</sub>·H<sub>2</sub>O and SiO<sub>2</sub> seeds solution were mixture at 25 °C. After that, the aqueous solution of TEOS (300 mL) was added into the reaction system stirred at 25 °C for 6 h, the SiO<sub>2</sub> PMS was obtained by centrifuged and vacuum dried at 30 °C for 12 h.

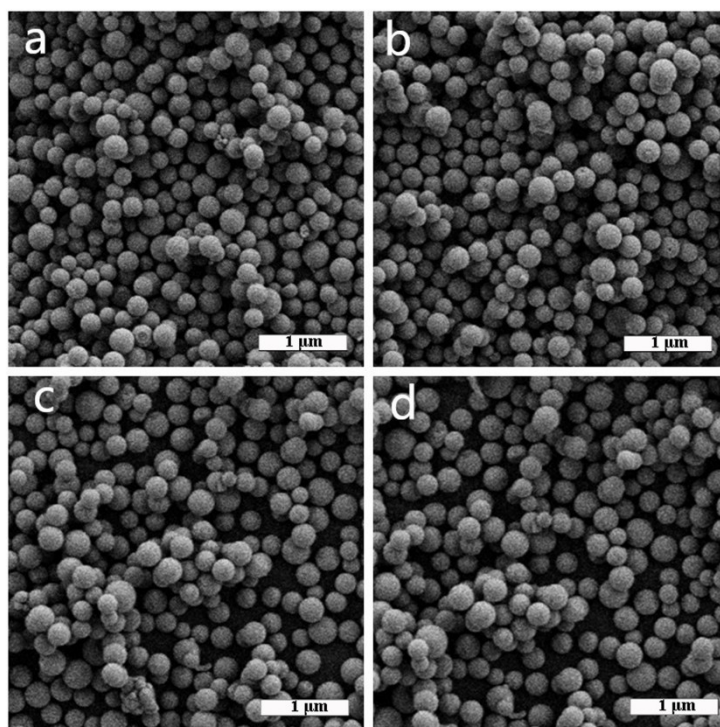

**Fig. S5†** SEM images of SiO<sub>2</sub> seeds prepared in different [TEOS] ([NH<sub>3</sub>·H<sub>2</sub>O] = 0.8 mol/L, [H<sub>2</sub>O] = 3.0 mol/L, T=25 °C): (a): [TEOS]=0.3 mol/L; (b): [TEOS]=0.4 mol/L; (c): [TEOS]=0.5 mol/L; (d): [TEOS]=0.6 mol/L

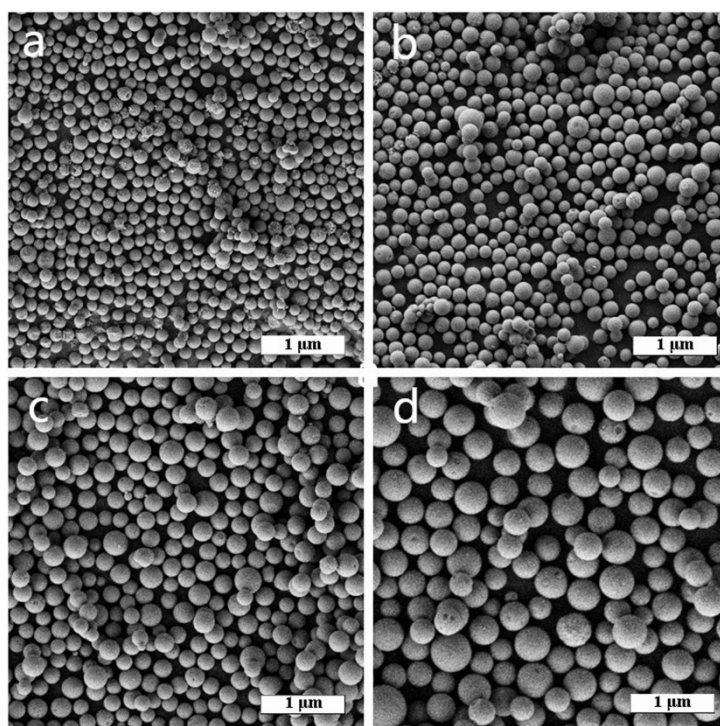

**Fig. S6†** SEM images of SiO<sub>2</sub> seeds prepared in different [NH<sub>3</sub>·H<sub>2</sub>O] ([TEOS] = 0.3 mol/L, [H<sub>2</sub>O] = 3.0 mol/L, T=25 °C): (a): [NH<sub>3</sub>·H<sub>2</sub>O] =0.4 mol/L; (b): [NH<sub>3</sub>·H<sub>2</sub>O] =0.6 mol/L; (c): [NH<sub>3</sub>·H<sub>2</sub>O] =0.8 mol/L; (d): [NH<sub>3</sub>·H<sub>2</sub>O] =1.0 mol/L

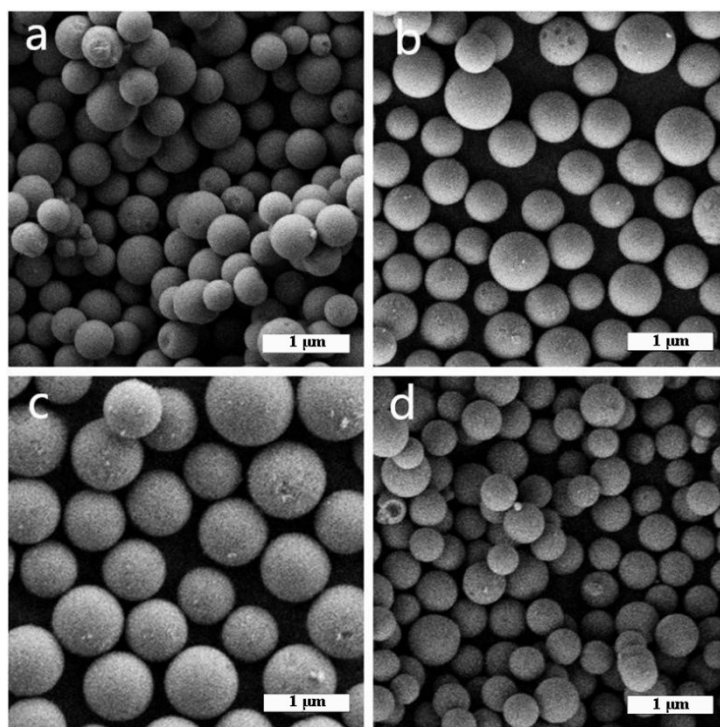

**Fig. S7†** SEM images of SiO<sub>2</sub> seeds prepared in different [H<sub>2</sub>O] ([NH<sub>3</sub>·H<sub>2</sub>O] = 1 mol/L, [TEOS] = 0.3 mol/L, T=25 °C): (a): [H<sub>2</sub>O] =4 mol/L; (b): [H<sub>2</sub>O] =6 mol/L; (c): [H<sub>2</sub>O] =8 mol/L; (d): [H<sub>2</sub>O] =10.0 mol/L

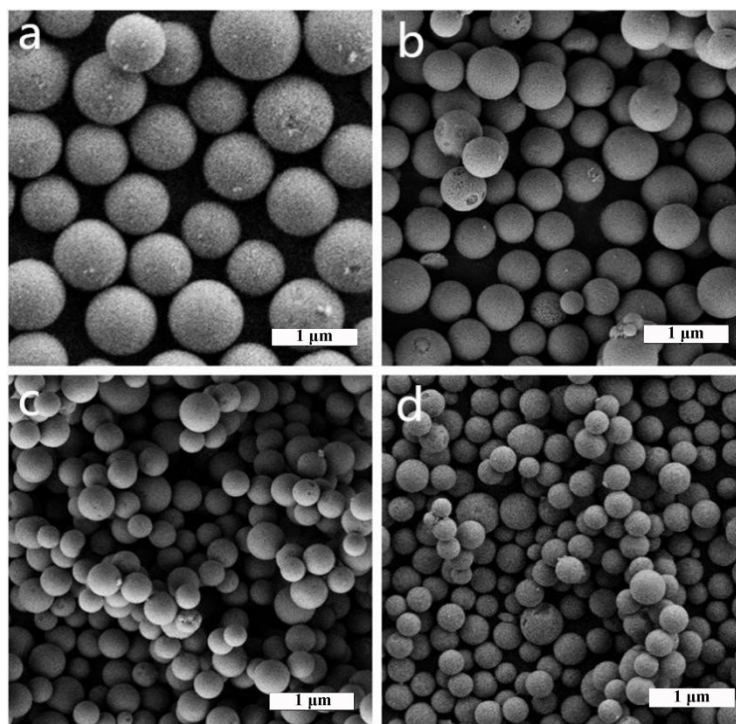

**Fig. S8†** SEM images of SiO<sub>2</sub> seeds prepared in different temperature ([NH<sub>3</sub>·H<sub>2</sub>O] = 1 mol/L, [H<sub>2</sub>O] = 8 mol/L, [TEOS]=0.3 mol/L): (a): T = 25 °C; (b): T =30 °C; (c): T =35 °C; (d): T =40 °C

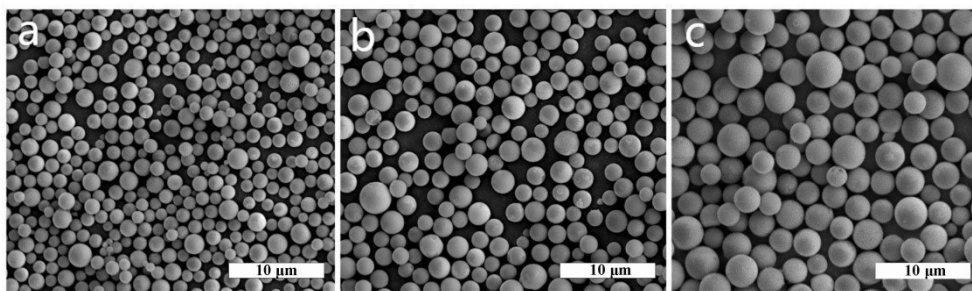

**Fig. S9†** SEM images of SiO<sub>2</sub> PMS prepared in different [TEOS] ([NH<sub>3</sub>·H<sub>2</sub>O] = 1 mol/L, T=25 °C): (a): [TEOS] = 0.3 mol/L; (b): [TEOS] = 0.4 mol/L; (c): [TEOS] = 0.5 mol/L.

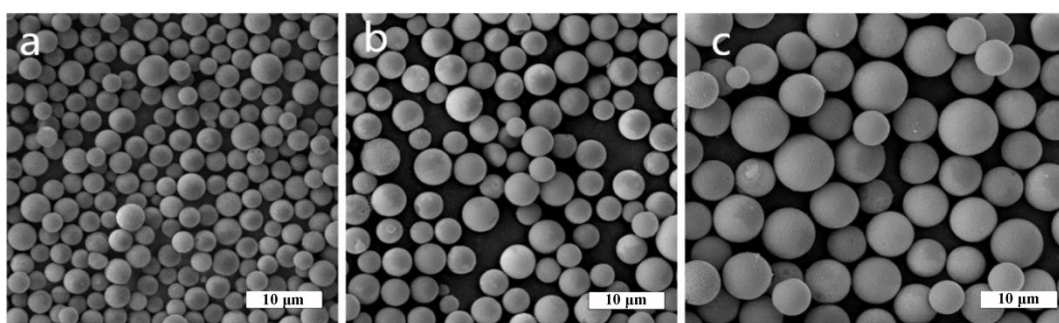

**Fig. S10†** SEM images of SiO<sub>2</sub> PMS prepared in different [NH<sub>3</sub>·H<sub>2</sub>O] ([TEOS] = 0.4 mol/L, T=25 °C): (a): [NH<sub>3</sub>·H<sub>2</sub>O] = 1 mol/L; (b): [NH<sub>3</sub>·H<sub>2</sub>O] = 1.5 mol/L; (c): [NH<sub>3</sub>·H<sub>2</sub>O] = 2.0 mol/L.

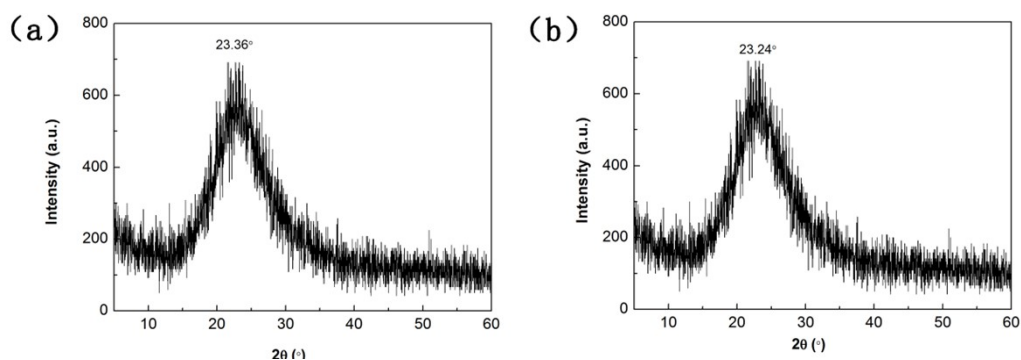

**Fig. S11†** XRD patterns of (a) SiO<sub>2</sub> seeds and (b) SiO<sub>2</sub> PMS

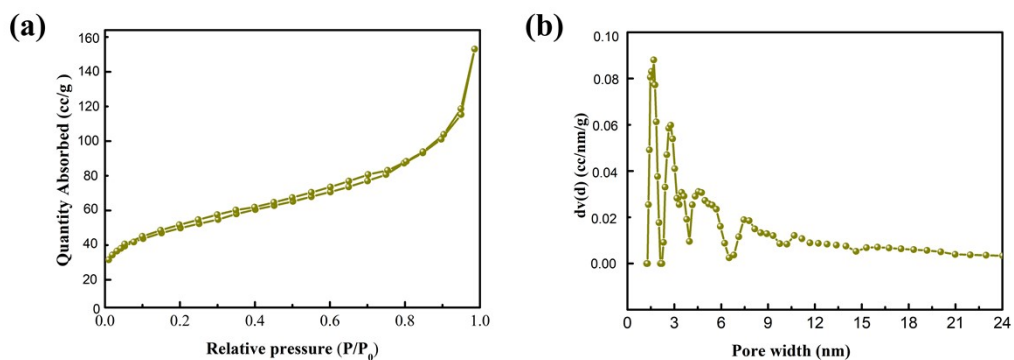

**Fig. S12†** The (a) N<sub>2</sub> adsorption–desorption isotherms and (b) pore size distribution of SiO<sub>2</sub> PMS

#### 4. Hybridization of CPA into SiO<sub>2</sub> PMS during the growth process of microspheres

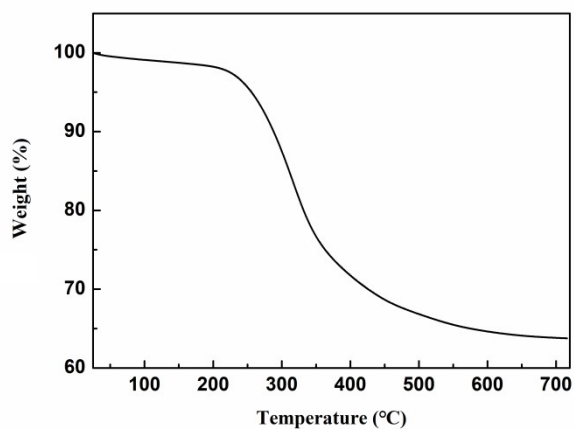

**Fig. S13†** TGA curve of HCSP

## 5. Evaluation of chiral recognition ability of the HCSP

**Table S1†** Solubility of PPA-CSP and HCSP <sup>a</sup>

| Solvent | MeOH | CHCl <sub>3</sub> | THF | DMF | DMAc | DMSO | H <sub>2</sub> O | n-hexane |
|---------|------|-------------------|-----|-----|------|------|------------------|----------|
| PPA-CSP | ++   | ++                | ++  | ++  | ++   | ++   | ++               | -        |
| HCSP    | -    | -                 | -   | -   | -    | -    | -                | -        |

<sup>a</sup> ++: Soluble; -: insoluble;

**Table S2†** Resolution of the racemates 1-8 on the HCSP after introducing THF <sup>a</sup>

| Racemates | HCSP<br>(H/I/T=94/5/1) |          |       | HCSP<br>(H/I/T=94/1/5) |          |       |
|-----------|------------------------|----------|-------|------------------------|----------|-------|
|           | $k_I'$                 | $\alpha$ | $R_s$ | $k_I'$                 | $\alpha$ | $R_s$ |
| <b>1</b>  | 0.54(-)                | ~1       | -     | 0.43(-)                | ~1       | -     |
| <b>2</b>  | 0.58(+)                | 1.28     | 1.33  | 0.31(+)                | 1.21     | 1.28  |
| <b>3</b>  | 12.69(+)               | 1.21     | 1.29  | 9.05(+)                | 1.20     | 1.25  |
| <b>4</b>  | 1.95                   | 1.00     | -     | 0.97                   | 1.00     | -     |
| <b>5</b>  | 3.31(+)                | ~1       | -     | 2.41(+)                | ~1       | -     |
| <b>6</b>  | 3.41                   | 1.00     | -     | 2.59                   | 1.00     | -     |
| <b>7</b>  | 12.36(-)               | 1.20     | 1.52  | 9.75(-)                | 1.15     | 1.27  |
| <b>8</b>  | 12.98(-)               | ~1       | -     | 10.25(-)               | ~1       | -     |

<sup>a</sup> Column: 0.2 × 25 cm (ID). Flow rate: 0.1 mL/min. The signs in parentheses stand for the optical rotation of the first-eluted enantiomer. Eluent: H, n-hexane; I, isopropanol; T, THF.

**Table S3†** Comparison of the separation factors ( $\alpha$ ) for racemate **7** on the commercial columns and HCSP

| Racemate                                                                                            | Daicel Chiralpak or Chiralcel |                 |                 | HCSP <sup>b</sup> |
|-----------------------------------------------------------------------------------------------------|-------------------------------|-----------------|-----------------|-------------------|
|                                                                                                     | AD <sup>a</sup>               | AS <sup>a</sup> | OD <sup>a</sup> |                   |
| <p><b>7</b></p> 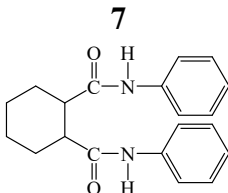 | 1.02 (-)                      | 1.25 (-)        | 2.07 (-)        | 3.43 (-)          |

<sup>a</sup> Column: 25 cm × 0.46 cm (ID). Flow rate: 0.1 mL/min. Eluent: hexane/isopropanol (90/10, v/v)

<sup>b</sup> Column: 25 cm × 0.2 cm (ID). Flow rate: 0.1 mL/min. Eluent: hexane/isopropanol/CHCl<sub>3</sub> (H/I/C=94/1/5, v/v/v)
